# Supplementary material for: Efficient coding of natural scene statistics predicts discrimination thresholds for grayscale textures
Source: eLife journal article supplement (doi:10.7554/elife.54347), 2020-08-03
Supplement: supp [file elife_poa_e54347_Transparent_Reporting_File.docx]

***eLife’s* transparent reporting form**

We encourage authors to provide detailed information *within their submission* to facilitate the interpretation and replication of experiments. Authors can upload supporting documentation to indicate the use of appropriate reporting guidelines for health-related research (see [EQUATOR Network](http://www.equator-network.org/%20)), life science research (see the [BioSharing Information Resource](https://biosharing.org/)), or the [ARRIVE guidelines](http://www.plosbiology.org/article/info:doi/10.1371/journal.pbio.1000412) for reporting work involving animal research. Where applicable, authors should refer to any relevant reporting standards documents in this form.

If you have any questions, please consult our Journal Policies and/or contact us: [editorial@elifesciences.org](mailto:editorial@elifesciences.org).

**Sample-size estimation**

- You should state whether an appropriate sample size was computed when the study was being designed
- You should state the statistical method of sample size computation and any required assumptions
- If no explicit power analysis was used, you should describe how you decided what sample (replicate) size (number) to use

Please outline where this information can be found within the submission (e.g., sections or figure legends), or explain why this information doesn’t apply to your submission:

The number of subjects and the number of trials per subject were based on the numbers used in previous similar studies (Hermundstad et al. 2014; Victor et al. 2005, 2012, 2013, 2014, 2015). A limited number of subjects sufficed, as results were very similar across subjects (and also, because each subject’s participation required ~50,000 trials, i.e., ~40 hours of viewing).

**Replicates**

- You should report how often each experiment was performed
- You should include a definition of biological versus technical replication
- The data obtained should be provided and sufficient information should be provided to indicate the number of independent biological and/or technical replicates
- If you encountered any outliers, you should describe how these were handled
- Criteria for exclusion/inclusion of data should be clearly stated
- High-throughput sequence data should be uploaded before submission, with a private link for reviewers provided (these are available from both GEO and ArrayExpress)

Please outline where this information can be found within the submission (e.g., sections or figure legends), or explain why this information doesn’t apply to your submission:

The number of subjects used (6) and the number of trials per subject per threshold (360) are described in the Methods (“Visual stimulus design” and “Psychophysics subjects”). Both the per-subject thresholds and averages across subjects (see Methods, “Psychophysics averaging”) are available on GitHub, at <https://github.com/ttesileanu/TextureAnalysis/tree/master/data>. The average thresholds are plotted in the main text (Figures 4 and 5), while per-subject data is shown in Appendix 5, Figures 3 and 4).

**Statistical reporting**

- Statistical analysis methods should be described and justified
- Raw data should be presented in figures whenever informative to do so (typically when N per group is less than 10)
- For each experiment, you should identify the statistical tests used, exact values of N, definitions of center, methods of multiple test correction, and dispersion and precision measures (e.g., mean, median, SD, SEM, confidence intervals; and, for the major substantive results, a measure of effect size (e.g., Pearson's r, Cohen's d)
- Report exact p-values wherever possible alongside the summary statistics and 95% confidence intervals. These should be reported for all key questions and not only when the p-value is less than 0.05.

Please outline where this information can be found within the submission (e.g., sections or figure legends), or explain why this information doesn’t apply to your submission:

The statistics used to generate average psychophysical thresholds and uncertainty values are described in Methods, “Psychophysics averaging”. The statistical analyses used to test the match between natural-image predictions and psychophysics are described in Appendix 4. Additional robustness/replication tests are described in Appendix 6.

(For large datasets, or papers with a very large number of statistical tests, you may upload a single table file with tests, Ns, etc., with reference to sections in the manuscript.)

**Group allocation**

- Indicate how samples were allocated into experimental groups (in the case of clinical studies, please specify allocation to treatment method); if randomization was used, please also state if restricted randomization was applied
- Indicate if masking was used during group allocation, data collection and/or data analysis

Please outline where this information can be found within the submission (e.g., sections or figure legends), or explain why this information doesn’t apply to your submission:

The trials were presented randomly to the subjects (see Methods, “Visual stimulus design”).

**Additional data files (“source data”)**

- We encourage you to upload relevant additional data files, such as numerical data that are represented as a graph in a figure, or as a summary table
- Where provided, these should be in the most useful format, and they can be uploaded as “Source data” files linked to a main figure or table
- Include model definition files including the full list of parameters used
- Include code used for data analysis (e.g., R, MatLab)
- Avoid stating that data files are “available upon request”

Please indicate the figures or tables for which source data files have been provided:

The threshold values per-subject and averaged across subjects can be found on GitHub, at <https://github.com/ttesileanu/TextureAnalysis/tree/master/data>. Analysis code is also available in the same repository (<https://github.com/ttesileanu/TextureAnalysis>). See in particular the script file/loadTernaryPP.m.
